# Supplementary material
Source: Research Square preprint supplement (doi:10.21203/rs.3.rs-10367280/v1)
Supplement: Supplementary file 1 [file 236c8f4eea61db52a8699df2.docx]

| Characteristic | Value |
| --- | --- |
| Participants included | 136 |
| Age (yr)* | 53 +/- 13, range 23-79 |
| Pre-/post- menopausal status | 51/85 |
| History |  |
| Mastectomy | 7 |
| Breast-conserving surgery | 18 |
| Implants | 6 |
| Indication for MRI |  |
| Clinical problem solving, tumor staging, surgical planning.  Surveillance in high-risk women with dense breasts | 114  22 |
| Number of breasts | 265 |
| Density per breast (number of breasts)** |  |
| A | 12 (5) |
| B | 85 (32) |
| C | 103 (39) |
| D | 65 (24) |
| BPE level per breast (number of breasts on MRI/SBCT)*** |  |
| 1 (minimal) | 140/172 (53/65) |
| 2 (mild) | 61/ 53 (23/20) |
| 3 (moderate) | 39/27 (15/10) |
| 4 (marked) | 25/13 ( 9/5) |
| Number of breasts with malignant lesions | 67 |
| Histology of lesions |  |
| Invasive breast cancer NST | 41 |
| Invasive lobular carcinoma | 12 |
| Ductal carcinoma in situ | 10 |
| Mucinous carcinoma | 2 |
| Liposarcoma | 1 |
| Apocrine carcinoma | 1 |

Note.- Unless otherwise noted, data are numbers of participants or breasts. BPE=background parenchymal enhancement, NST=no special type.
* mean +/- SD
** as stated in clinical mammography report, in number of breasts. Data in parentheses are
 percentages.
*** BPE on MRI as stated in clinical MRI-report; BPE on SBCT rated by one observer;
 in number of breasts. Data in parentheses are percentages.
