# Supplementary material
Source: Research Square preprint supplement (doi:10.21203/rs.3.rs-10367280/v1)
Supplement: Supplementary file 2 [file 3325e474c9e8077b922881bc.docx]

| Reader | Metric | MRI (95% CI) | CE‑SBCT (95% CI) |
| --- | --- | --- | --- |
| 1 | Sensitivity | 0.94 (0.90–0.97) | 0.94 (0.90–0.97) |
|  | Specificity | 0.91 (0.88–0.94) | 0.91 (0.88–0.94) |
|  | PPV | 0.78 (0.72–0.85) | 0.78 (0.72–0.85) |
|  | NPV | 0.97 (0.96–0.99) | 0.97 (0.96–0.99) |
| 2 | Sensitivity | 0.91 (0.86–0.97) | 0.95 (0.92–1.00) |
|  | Specificity | 0.90 (0.87–0.93) | 0.91 (0.88–0.94) |
|  | PPV | 0.76 (0.68–0.83) | 0.79 (0.72–0.86) |
|  | NPV | 0.96 (0.95–0.99) | 0.98 (0.97–1.00) |
| 3 | Sensitivity | 0.88 (0.82–0.94) | 0.88 (0.82–0.94) |
|  | Specificity | 0.93 (0.91–0.96) | 0.94 (0.92–0.96) |
|  | PPV | 0.81(0.75–0.88) | 0.84 (0.77–0.90) |
|  | NPV | 0.95 (0.94–0.98) | 0.96 (0.94–0.98) |

PPV – Positive Predictive Value
NPV – Negative Predictive Value
