# Supplementary material
Source: Research Square preprint supplement (doi:10.21203/rs.3.rs-10367280/v1)
Supplement: Supplementary file 3 [file 402d5ca705e4ee9414d0425b.docx]

| Reader | MRI (95%CI) | CE-SBCT (95%CI) |
| --- | --- | --- |
| 1 | 0.93 (0.89 - 0.96) | 0.93 (0.89 - 0.96) |
| 2 | 0.90 (0.87 - 0.95) | 0.93 (0.89 - 0.96) |
| 3 | 0.90 (0.86 - 0.95) | 0.91 (0.87 - 0.95) |
