# Supplementary material
Source: Research Square preprint supplement (doi:10.21203/rs.3.rs-10367280/v1)
Supplement: Supplementary file 4 [file 7480b42b39f2fccabff787d5.docx]

| **Metric** | **MRI (95% CI)** | **CE‑SBCT (95% CI)** | **Difference** |
| --- | --- | --- | --- |
| Sensitivity | 0.91 (0.88–0.94) | 0.93 (0.88–0.95) | -0.02 (-0.08 to + 0.05) |
| Specificity | 0.92 (0.91–0.94) | 0.93(0.92–0.95) | -0.01 (-0.03 to + 0.01) |
| PPV | 0.71 (0.61–0.80) | 0.74 (0.64–0.83) | -0.02 (-0.07 to + 0.03) |
| NPV | 0.97 (0.96–0.98) | 0.99 (0.98–0.99) | -0.02 (-0.02 to +0.01) |

Note.- Mean reader averaged data for all breasts (n=265- malignancy in 67).
PPV – Positive Predictive Value
NPV – Negative Predictive Value

Cases were resampled with replacement 1,000 times to generate paired MRI and CE-SBCT estimates for each iteration. For every bootstrap sample, sensitivity, specificity, PPV, and NPV were calculated.
