# Supplementary material
Source: Research Square preprint supplement (doi:10.21203/rs.3.rs-10367280/v1)
Supplement: Supplementary file 5 [file 8d7c4060cd8f65c637af5fd0.docx]

| **Metric** | **MRI (95% CI)** | **CE-SBCT (95% CI)** | **Difference** |
| --- | --- | --- | --- |
| Sensitivity | 0.92 (0.89 – 0.94) | 0.92 (0.89 – 0.94) | -0.01 (-0.16 to +0.03) |
| Specificity | 0.92 (0.90 – 0.93) | 0.92 (0.91 – 0.93) | -0.01 (-0.05 to + 0.03) |
| PPV | 0.76 (0.68– 0.84) | 0.76 (0.68 – 0.84) | -0.03 (-0.05 to + 0.03) |
| NPV | 0.97 (0.96– 0.99) | 0.98 (0.96 – 0.90) | -0.01(-0.03 to 0.00) |

Note.- Mean reader averaged data for dense breasts (n=168- malignancy in 35).
PPV – Positive Predictive Value
NPV – Negative Predictive Value
